# Supplementary material
Source: PubMed Central journal article supplement (PMC3805048)
Supplement: NIHMS504209-supplement-1_si_001.pdf [file NIHMS504209-supplement-1_si_001.pdf]

## Supporting Information

### CuS<sub>2</sub>-passivated Au-core, Au<sub>3</sub>Cu-shell nanoparticles analyzed by atomistic-resolution C<sub>s</sub>-Corrected STEM

Subarna Khanal,<sup>†</sup> Gilberto Casillas,<sup>†</sup> Nabraj Bhattarai,<sup>†</sup> J. Jesús Velázquez-Salazar,<sup>†</sup> Ulises Santiago,<sup>†</sup> Arturo Ponce,<sup>†</sup> Sergio Mejía-Rosales<sup>‡</sup> and Miguel José-Yacamán<sup>†\*</sup>

<sup>†</sup>Department of Physics and Astronomy, University of Texas at San Antonio, One UTSA Circle, San Antonio, TX, 78249

<sup>‡</sup>Center for Innovation, Research and Development in Engineering and Technology, and CICFIM-Facultad de Ciencias Físico-Matemáticas, Universidad Autónoma de Nuevo León, San Nicolás de los Garza, NL 66450, Mexico until

E-mail: [miguel.yacaman@utsa.edu](mailto:miguel.yacaman@utsa.edu)

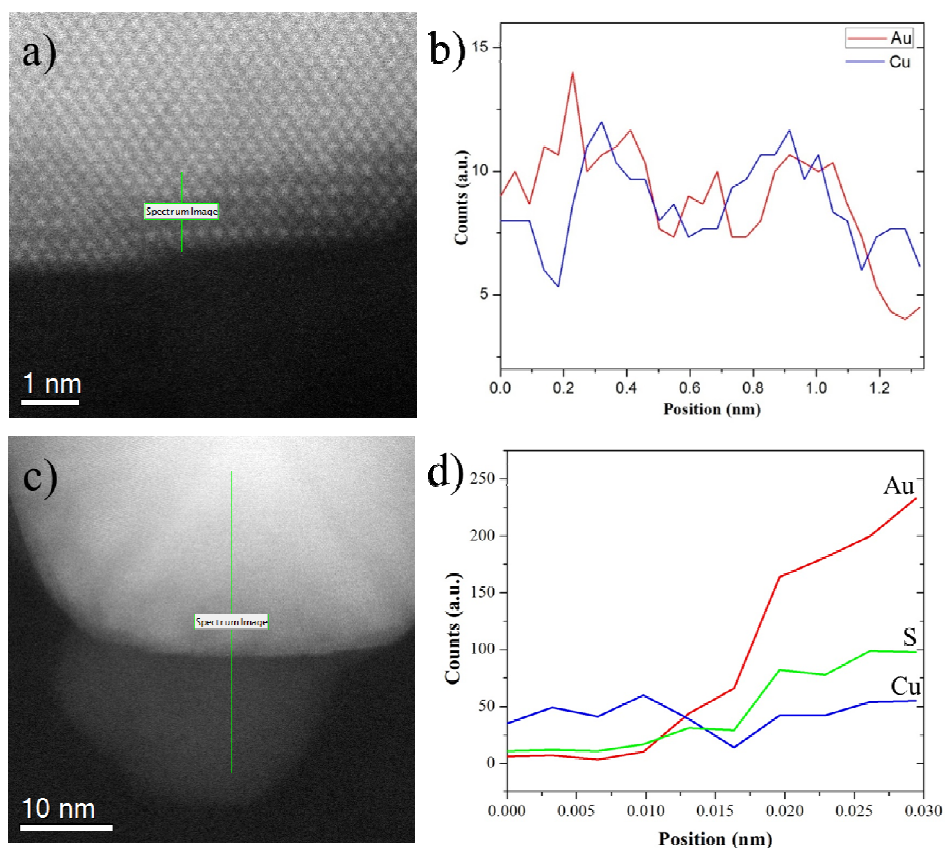

**Figure S1.** STEM-EDS line scanning (a) along interface, (b) showing the presence of Au and Cu, (c) along core-shell region with surface layer, (d) showing the presence of Au, S and Cu. It can be seen clearly that Au signal is very strong while Cu and S signals are flat, indicating that CuS<sub>2</sub> surface layer is present.

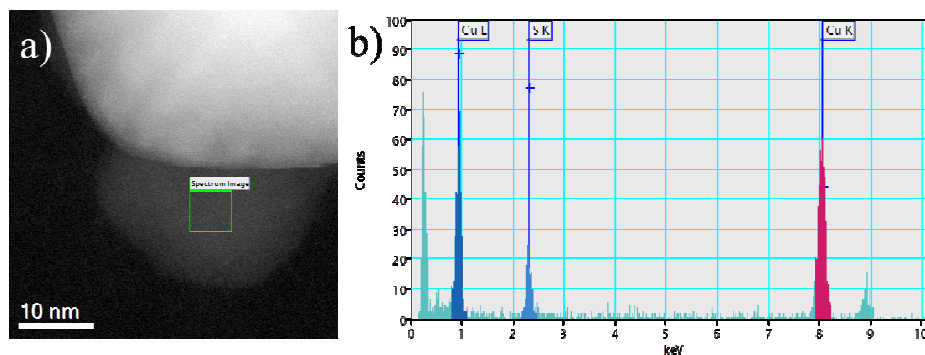

**Figure S2.** EDS spectrum of  $\text{CuS}_2$  surface layer, which shows the presence of Cu and S in the elemental composition of the surface layers.

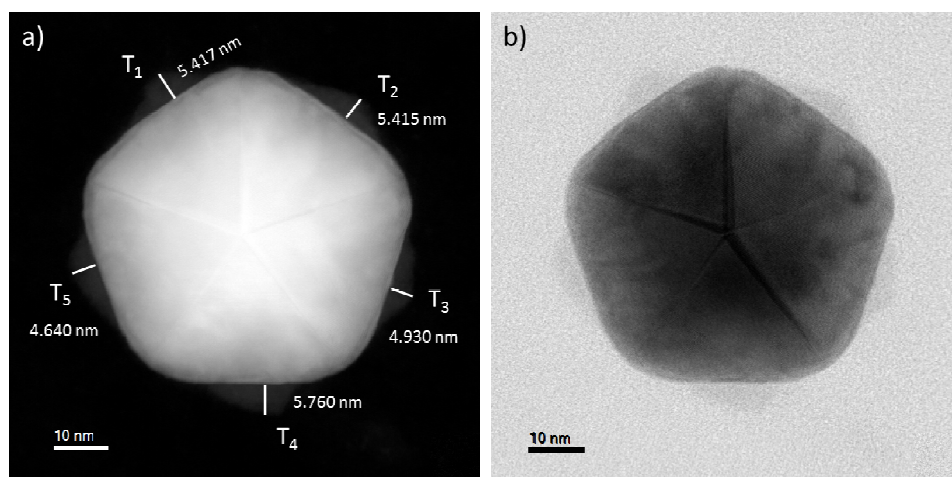

**Figure S3.** (a) High angle annular dark field (HAADF) and (b) Bright Field (BF) STEM micrographs of Decahedral Au- $\text{CuS}_2$  Core-shell nanoparticles, shows the average thickness of the shell is 5.23 nm.

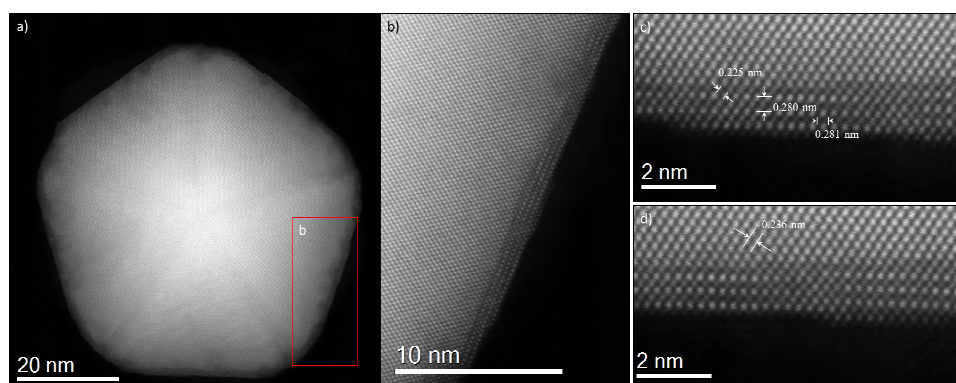

**Figure S4.** HAADF STEM image of decahedral nanoparticles different magnification and lattice spacing between Au and Cu interface boundary region.

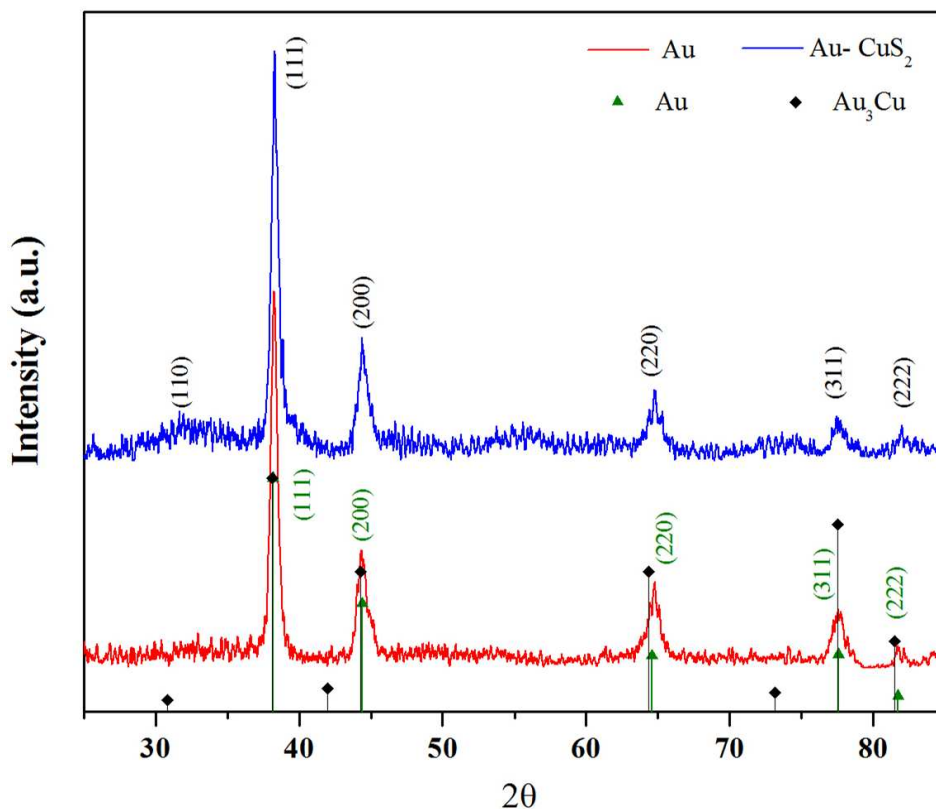

**Figure S5.** X-Ray diffraction patterns of Au core and Au-CuS<sub>2</sub> nanoparticles. Standard patterns for Au and Au<sub>3</sub>Cu are also inserted in the figure. Full width half maxima (FWHM) value is measured for Au and Au<sub>3</sub>Cu. The obtained values for Au is 0.93°, 0.97° and 1.17° while for Au<sub>3</sub>Cu is 0.97°, 1.25° and 1.67° corresponding to (200), (220) and (311) planes, suggesting broader diffraction peak for Au<sub>3</sub>Cu than for Au core.

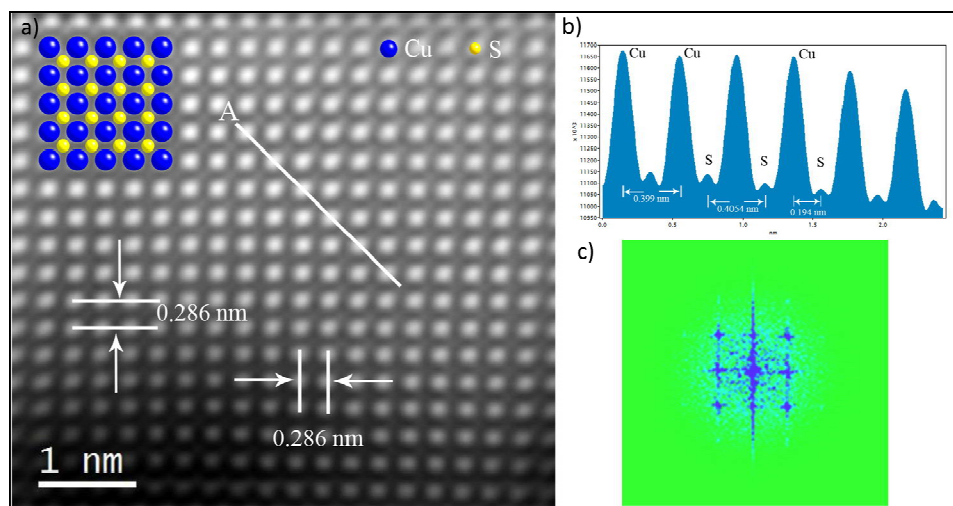

**Figure S6.** (a) Atomic resolution HAADF image of CuS<sub>2</sub> surface layer, the inset model structure of CuS<sub>2</sub> is exactly match with this image, (b) Intensity profile of surface layer shows the disparity of the Cu rich and S rich atomic columns, (c) The fast Fourier transform (FFT) pattern of the shell region.
